# Supplementary material for: A Prospective Multicenter Evaluation of the Accuracy and Safety of an Implanted Continuous Glucose Sensor: The PRECISION Study
Source: PubMed Central journal article supplement (PMC6532543; doi:10.1089/dia.2019.0020), 2019-05-07
Supplement: Supp_Fig1.pdf [file Supp_Fig1.pdf]

## Supplementary Data

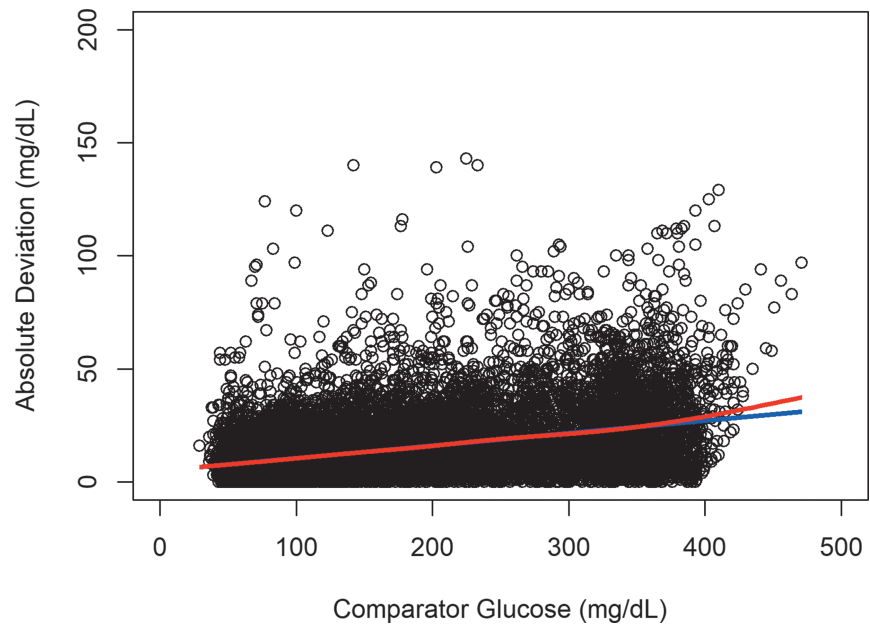

**SUPPLEMENTARY FIG. S1.** Absolute deviation between CGM and reference glucose with respect to reference comparator glucose. Linear best fit line in blue and nonlinear best fit line in red. CGM, continuous glucose monitoring.
