# Supplementary material for: A Prospective Multicenter Evaluation of the Accuracy and Safety of an Implanted Continuous Glucose Sensor: The PRECISION Study
Source: PubMed Central journal article supplement (PMC6532543; doi:10.1089/dia.2019.0020), 2019-05-07
Supplement: Supp_Fig2.pdf [file Supp_Fig2.pdf]

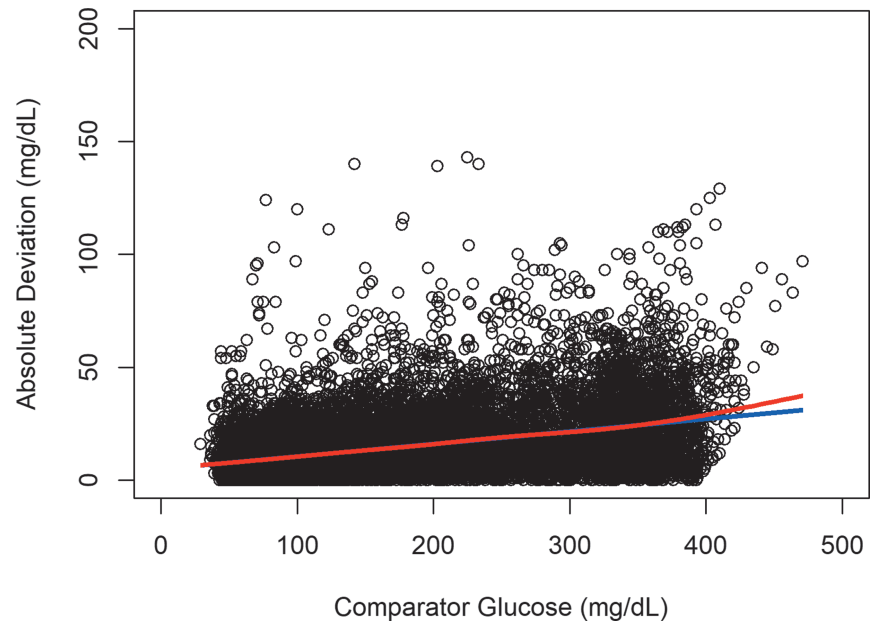

**SUPPLEMENTARY FIG. S2.** Bland–Altman plot.
