# Supplementary material for: A Prospective Multicenter Evaluation of the Accuracy and Safety of an Implanted Continuous Glucose Sensor: The PRECISION Study
Source: PubMed Central journal article supplement (PMC6532543; doi:10.1089/dia.2019.0020), 2019-05-07
Supplement: Supp_Table1.pdf [file Supp_Table1.pdf]

SUPPLEMENTARY TABLE S1. PRECISION STUDY: EFFECT OF SYSTEM RATE OF CHANGE ON CGM SYSTEM AND REFERENCE AGREEMENT

| <i>CGM system rate of change (mg/[dL·min])</i> | <i>No. of paired CGM system-YSI reference readings</i> | <i>Percent of CGM system readings within</i> |                            |                            |                            |
|------------------------------------------------|--------------------------------------------------------|----------------------------------------------|----------------------------|----------------------------|----------------------------|
|                                                |                                                        | <i>15/15% of reference</i>                   | <i>20/20% of reference</i> | <i>30/30% of reference</i> | <i>40/40% of reference</i> |
| Less than -2                                   | 475                                                    | 79                                           | 91                         | 97                         | 99                         |
| (-2, -1)                                       | 1137                                                   | 84                                           | 92                         | 98                         | 99                         |
| (-1, 1)                                        | 10,928                                                 | 87                                           | 94                         | 98                         | 100                        |
| (1, 2)                                         | 1013                                                   | 82                                           | 91                         | 98                         | 99                         |
| More than 2                                    | 539                                                    | 76                                           | 87                         | 97                         | 99                         |
