# Supplementary material for: A Prospective Multicenter Evaluation of the Accuracy and Safety of an Implanted Continuous Glucose Sensor: The PRECISION Study
Source: PubMed Central journal article supplement (PMC6532543; doi:10.1089/dia.2019.0020), 2019-05-07
Supplement: Supp_Table2.pdf [file Supp_Table2.pdf]

SUPPLEMENTARY TABLE S2. PRECISE II WITH UPDATED GLUCOSE CALCULATION ALGORITHM  
AGREEMENT TO REFERENCE

| <i>Reference glucose<br/>range (mg/dL)</i> | <i>No. of paired<br/>CGM system-YSI<br/>reference readings</i> | <i>Percent of CGM system readings within</i> |                                |                                |                                |
|--------------------------------------------|----------------------------------------------------------------|----------------------------------------------|--------------------------------|--------------------------------|--------------------------------|
|                                            |                                                                | <i>15/15%<br/>of reference</i>               | <i>20/20%<br/>of reference</i> | <i>30/30%<br/>of reference</i> | <i>40/40%<br/>of reference</i> |
| ≤54                                        | 224                                                            | 89                                           | 94                             | 99                             | 100                            |
| >54 to <71                                 | 848                                                            | 87                                           | 95                             | 98                             | 99                             |
| 71 to 180                                  | 8122                                                           | 85                                           | 93                             | 98                             | 99                             |
| >180                                       | 8122                                                           | 85                                           | 93                             | 98                             | 99                             |
| Total                                      | 15,753                                                         | 87                                           | 94                             | 99                             | 100                            |
